# Supplementary material
Source: Springer Nature journal article supplement (https://www.springermedizin.de/resource/supplementary/12943_2012_1036_MOESM3_ESM.pdf/9552144)
Supplement: MOESM3 [file 9552144]

Supplement Fig 3

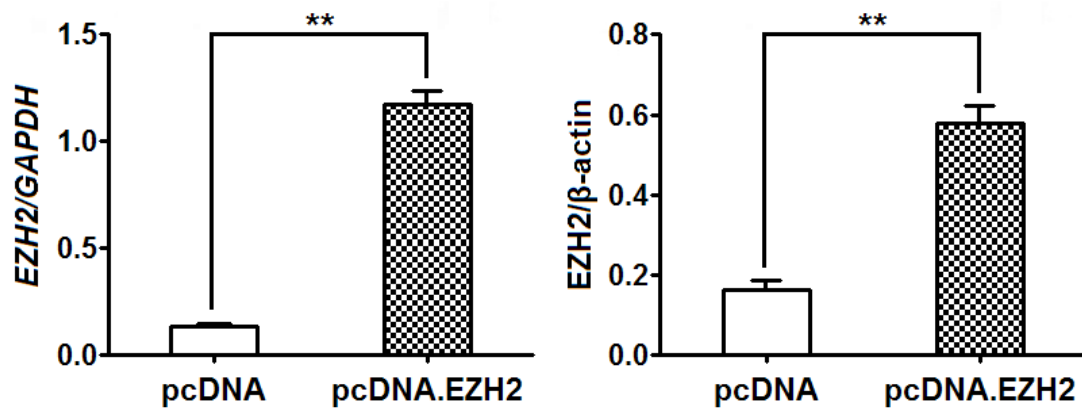

Fig.S3 The expression levels of EZH2 was significantly increased in Eca109 cells transfected with pcDNA.EZH2.

Eca109 cells were transfected with pcDNA.EZH2 (or empty pcDNA plasmid). The expression level of EZH2 mRNA and protein was detected by qRT-PCR and western blot and normalized to that of GAPDH and β-actin at 48 hr post-transfection, respectively. Histogram showed the expression level of EZH2 mRNA (A) and protein (B) in pcDNA.EZH2-transfected and empty pcDNA-transfected Eca109 cells. \*\*,  $P < 0.01$  by t test.
